# Supplementary material for: Epithelial organ shape is generated by patterned actomyosin contractility and maintained by the extracellular matrix
Source: PubMed Central journal article supplement (PMC7480841; doi:10.1371/journal.pcbi.1008105), 2020-08-20
Supplement: pcbi.1008105.s007.pdf [file pcbi.1008105.s007.pdf]

### S7 Text: Computational model parameters

Parameters used in model simulations in wild type and perturbed cases are listed in the Tables A-E.

**Table A.** Energy functions parameters used for dome shape profile formation in wild type simulation as shown in Fig 5A-5A' in the main text. These parameters are used in the right-hand sides of the Equations 1-3.

| Energy     | Definition                                   | Interaction Type    | Values                                                        | Reference                   |
|------------|----------------------------------------------|---------------------|---------------------------------------------------------------|-----------------------------|
| $E_v$      | Volume exclusion                             | Morse               | $U_v = -V_v$<br>$= 7.04 \text{ nN} \cdot \mu\text{m}$         | Ref. [1]                    |
|            |                                              |                     | $\zeta_v = v = 0.375 \mu\text{m}$                             |                             |
|            |                                              |                     | $L_{vMax} = 0.78125 \mu\text{m}$                              |                             |
| $E_{nuc}$  | Size of nuclear                              | Morse               | $U_{nuc} = 12.8 \text{ nN} \cdot \mu\text{m}$                 | This work                   |
|            |                                              |                     | $\zeta_{nuc} = 0.224 \mu\text{m}$                             |                             |
|            |                                              |                     | $V_{nuc} = 9.6 \text{ nN} \cdot \mu\text{m}$                  |                             |
|            |                                              |                     | $\gamma_{nuc} = 3.36 \mu\text{m}$                             |                             |
|            |                                              |                     | $L_{nucMax} = 3.5 \mu\text{m}$                                |                             |
| $E_{adhL}$ | E-cadherin                                   | Spring              | $k_{adhL} = 200 \text{ nN}/\mu\text{m}$                       | Ref. [1]                    |
| $E_{adhB}$ | Integrin                                     | Spring              | $k_{adhB} = 400 \text{ nN}/\mu\text{m}$                       | Ref. [1,2]                  |
| $E_{adhA}$ | Adhesion between columnar and squamous cells | Spring              | $k_{adhA} = 20 \text{ nN}/\mu\text{m}$                        | This work                   |
|            |                                              |                     | $L0_{adhA} = L0_{adhB}$<br>$= L0_{adhL} = 0.0625 \mu\text{m}$ |                             |
| $E_{cont}$ | Basal actomyosin contractility               | Spring              | $k_{cont} = 9 \text{ nN}/\mu\text{m}$                         | Result of model calibration |
|            |                                              |                     | $L0_{cont} = 0.03125 \mu\text{m}$                             |                             |
| $E_{memb}$ | Membrane stiffness                           | Spring              | $k_{memb} = 1800 \text{ nN}/\mu\text{m}$                      | Ref. [1]                    |
| $E_{ECM}$  | ECM stiffness                                | Spring              | $k_{ECM} = 4500 \text{ nN}/\mu\text{m}$                       | Ref. [3]                    |
|            |                                              |                     | $L0_{ECM-pouch}$<br>$= -0.06 \mu\text{m}$                     |                             |
|            |                                              |                     | $L0_{ECM-BC} = -0.06 \mu\text{m}$                             |                             |
|            |                                              |                     | $L0_{ECM-perip} = 0.06 \mu\text{m}$                           |                             |
| $E_{vol}$  | Conserving volume of cytoplasm               | Lagrange multiplier | $k_{vol} = 30 \text{ nN}/\mu\text{m}^2$                       | Ref. [4]                    |
|            |                                              |                     | $\Omega_{opouch} = \Omega_{operip}$<br>$= 65 \mu\text{m}^2$   |                             |
|            |                                              |                     | $\Omega_{0BC} = 20 \mu\text{m}^2$                             |                             |

**SI Table B.** Parameters in the wild type simulations before and after dome shape of wing disc is formed. Other parameters are the same as shown in the Table A.

| Parameter  | Definition                               | Before dome shape profile formation   | After dome shape profile formation       |
|------------|------------------------------------------|---------------------------------------|------------------------------------------|
| $C_{ECM}$  | Damping coefficient (resistance to move) | $36 \text{ nN}/\mu\text{ms}$          | $36 \times 10^3 \text{ nN}/\mu\text{ms}$ |
| $E_{cont}$ | Basal actomyosin contractility           | $k_{cont} = 9 \text{ nN}/\mu\text{m}$ | $k_{cont} = 0 \text{ nN}/\mu\text{m}$    |

**SI Table C.** Parameters of energy functions representing effects of the actomyosin inhibition by using Latrunculin corresponding to Fig. 7B'. Other parameters are the same as in the last column of SI Table B and in SI Table A.

| Energy     | Definition                                 | Interaction Type | Values         |
|------------|--------------------------------------------|------------------|----------------|
| $E_{adhA}$ | Adhesion between columnar & squamous cells | Spring           | $k_{adhA} = 0$ |

**SI Table D.** Parameters of energy functions represent effects of ECM removal. The parameters correspond Fig. 8B'-D'. Other parameters are the same as in the last column of SI Table B and SI Table A.

| Energy     | Definition    | Interaction Type | Values         |
|------------|---------------|------------------|----------------|
| $E_{adhB}$ | Integrin      | Spring           | $k_{adhB} = 0$ |
| $E_{ECM}$  | ECM stiffness | Spring           | $k_{ecm} = 0$  |

**SI Table E.** Parameters of energy functions represents effects of ECM removal and actomyosin inhibition through ROCK inhibition. The parameters correspond Figure 9B'-D'. Other parameters are the same as in the last column of SI Table B and SI Table A.

| Energy     | Definition                                   | Interaction Type | Values         |
|------------|----------------------------------------------|------------------|----------------|
| $E_{adhA}$ | Adhesion between columnar and squamous cells | Spring           | $k_{adhA} = 0$ |
| $E_{adhB}$ | Integrin                                     | Spring           | $k_{adhB} = 0$ |
| $E_{ECM}$  | ECM stiffness                                | Spring           | $k_{ecm} = 0$  |

## References:

1. Nematbakhsh A, Sun W, Brodskiy PA, Amiri A, Narciso C, Xu Z, et al. Multi-scale computational study of the mechanical regulation of cell mitotic rounding in epithelia. PLoS Comput Biol. 2017;13(5):e1005533.
2. Sim JY, Moeller J, Hart KC, Ramallo D, Vogel V, Dunn AR, et al. Spatial distribution of cell-cell and cell-ECM adhesions regulates force balance while maintaining E-cadherin molecular tension in cell pairs. Mol Biol Cell. 2015;26(13):2456-2465.

3. Keller A, Lanfranconi F, Aegerter CM. The influence of geometry on the elastic properties of the *Drosophila* wing disc. *Phys Stat Mech Its Appl*. 2018;510:208–218.
4. Pivkin IV, Karniadakis GE. Accurate coarse-grained modeling of red blood cells. *Phys Rev Lett*. 2008;101(11):118105.
